# Supplementary material for: Effects of small-sided recreational team handball training on mechanical muscle function, body composition and bone mineralization in untrained young adults—A randomized controlled trial
Source: PubMed Central journal article supplement (PMC7673568; doi:10.1371/journal.pone.0241359), 2020-11-18

Figure 1

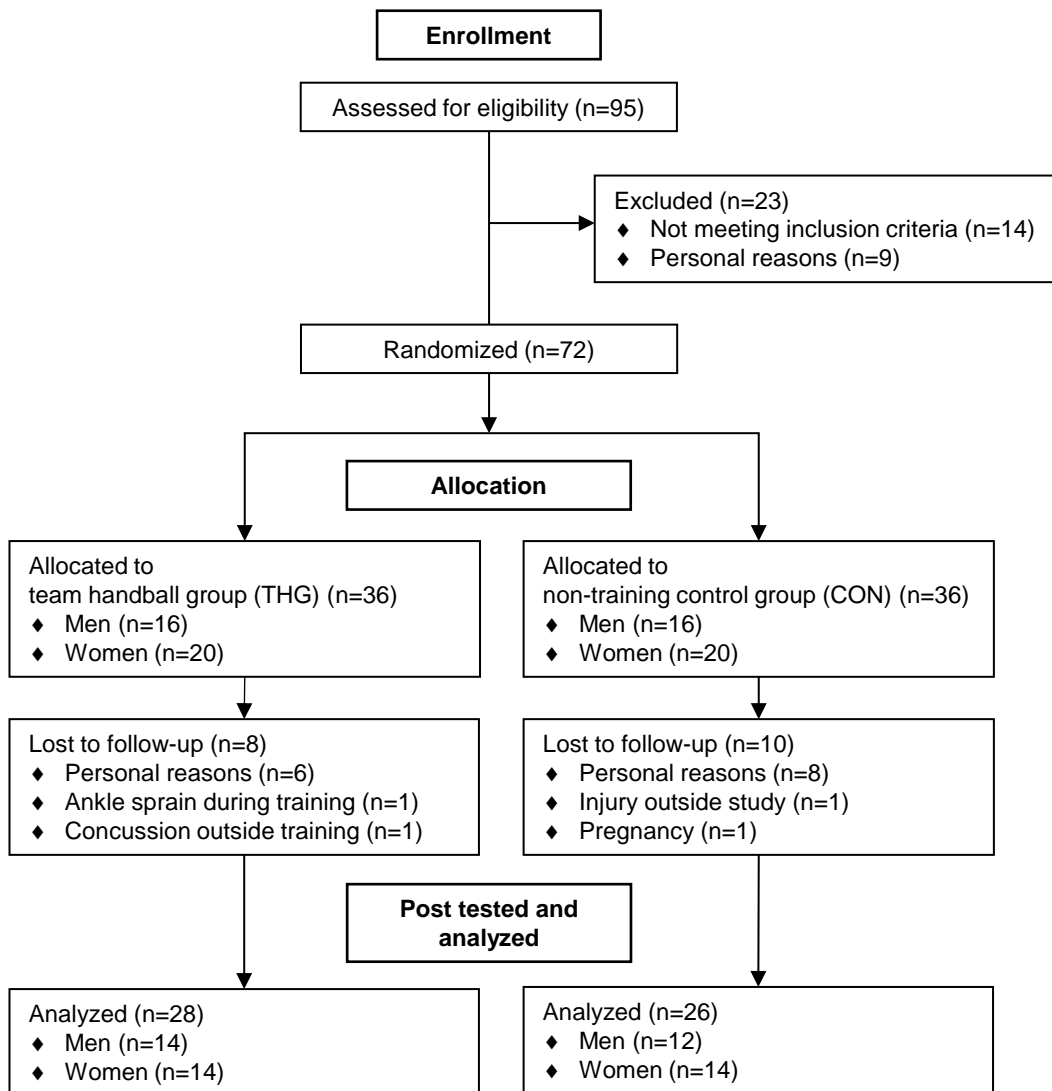

Supplement: pone.0241359.s001.pdf [file pone.0241359.s001.pdf]
